# Supplementary material for: Glyoxals as in vivo RNA structural probes of guanine base-pairing
Source: PubMed Central journal article supplement — RNA. 2018 Jan;24(1):114–24. doi: 10.1261/rna.064014.117 (PMC5733565; doi:10.1261/rna.064014.117), 2018-01
Supplement: supp_064014.117_Supplemental_Information.pdf [file supp_064014.117_Supplemental_Information.pdf]

# Supplemental Information

## Glyoxals as *In Vivo* RNA Structural Probes of Guanine Base Pairing

David Mitchell III<sup>1,2</sup>, Laura E. Ritchey<sup>1,2</sup>, Hongmarn Park<sup>2,3</sup>, Paul Babitzke<sup>2,3</sup>, Sarah M. Assmann<sup>4</sup>, and Philip C. Bevilacqua<sup>1,2,3</sup>

<sup>1</sup>*Department of Chemistry, The Pennsylvania State University, University Park, PA 16802, USA.*

<sup>2</sup>*Center for RNA Molecular Biology, The Pennsylvania State University, University Park, PA 16802, USA.*

<sup>3</sup>*Department of Biochemistry and Molecular Biology, The Pennsylvania State University, University Park, PA 16802, USA.*

<sup>4</sup>*Department of Biology, The Pennsylvania State University, University Park, PA 16802, USA.*

\**Corresponding author: e-mail: [pcb5@psu.edu](mailto:pcb5@psu.edu); Phone: (814) 863-3812; Fax: (814) 865-2927*

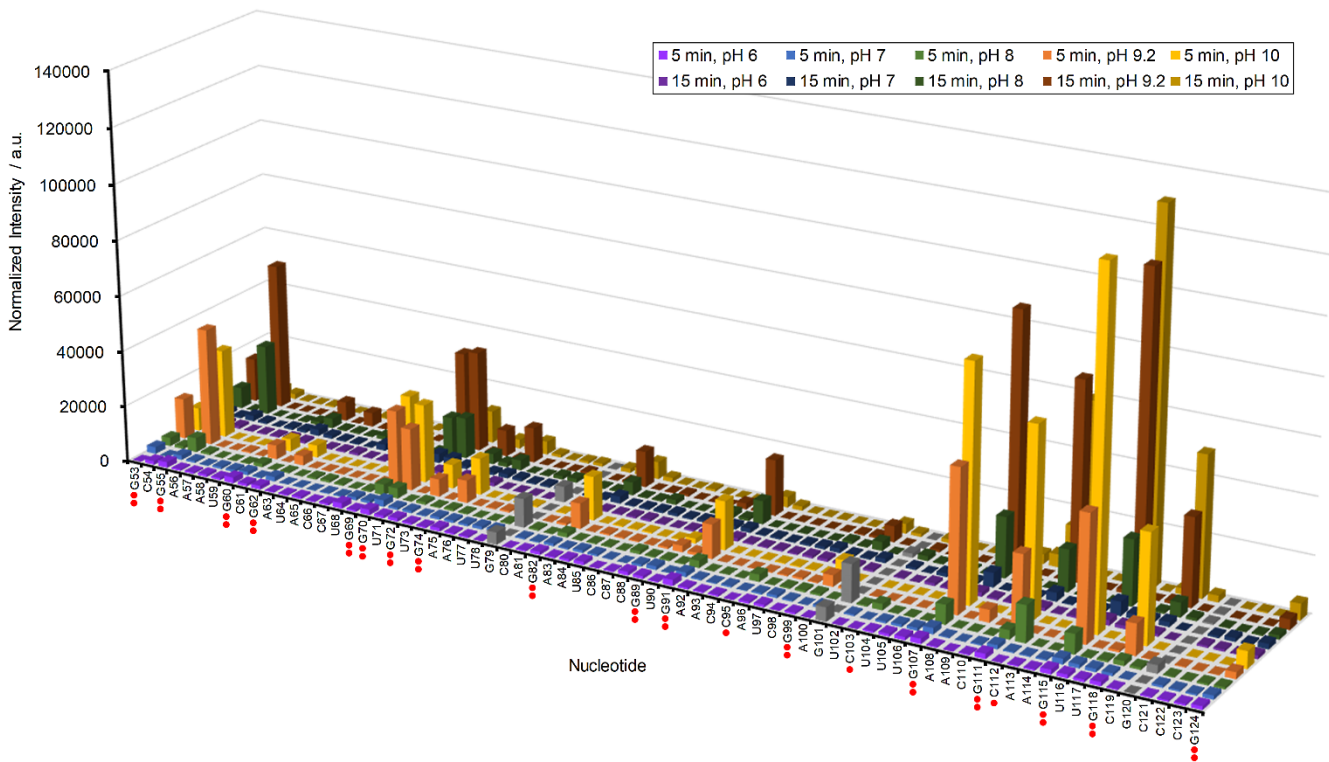

**Supplemental Figure S1.** Modification of rice 5.8S rRNA *in vitro* by glyoxal. All nucleotides within the examined range (G53-G124) are shown. A red dot indicates glyoxalated cytidines at buffer pH 8 and 5 min reaction time, whereas two red dots indicate glyoxalated guanosines. While uridines are shown, glyoxal cannot react with uridines (see Fig. 2 in main text). Therefore, no uridine residues are given red dots. Normalized intensities for each nucleotide are grouped by reaction time, with 5 min reaction times given a lighter color and 15 min reaction times given a darker color. G79, G101, and G120, which are the residues that give natural reverse transcriptase stops, are colored grey.

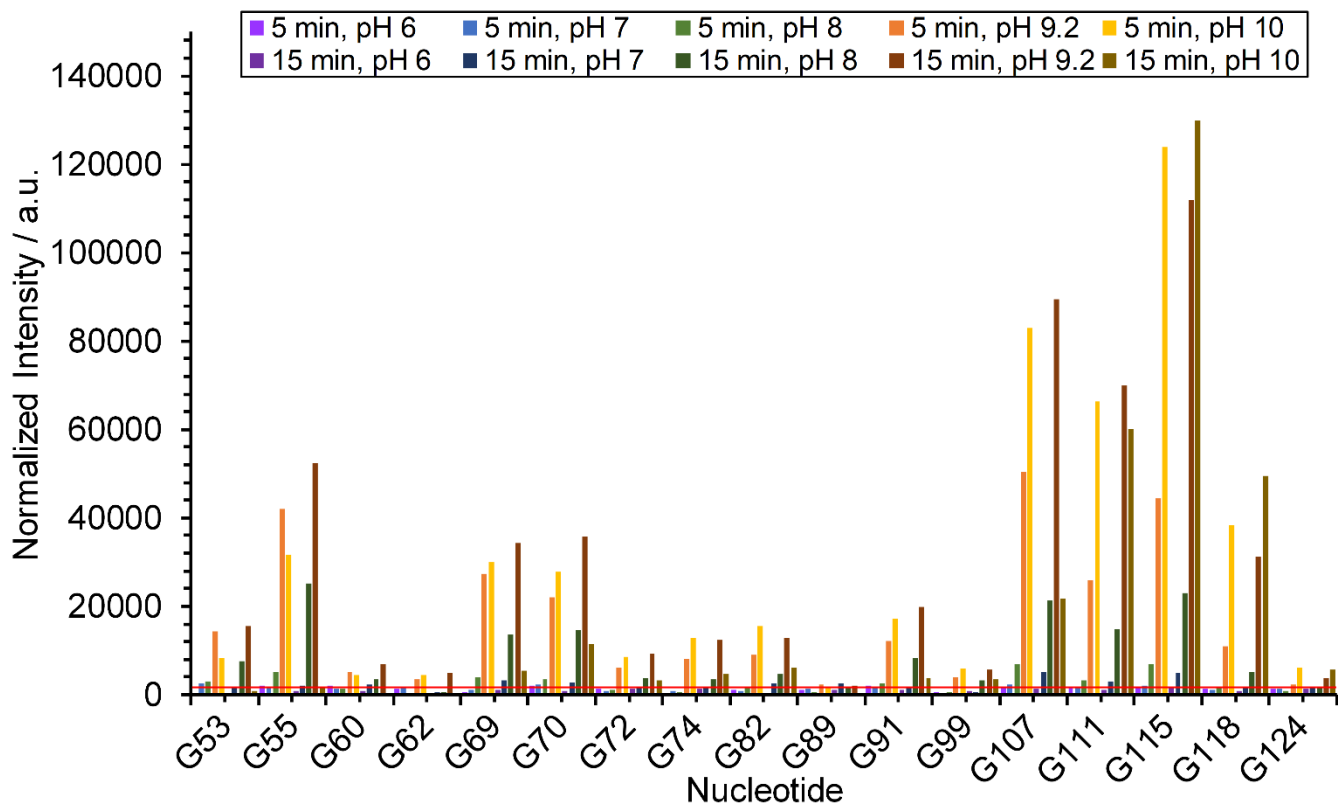

**Supplemental Figure S2.** *In vitro* modification of guanosine residues with rice 5.8S rRNA by glyoxal. Normalized band intensities of all guanosine nucleotides within the examined range (G53-G124) are shown except for the three guanosines that give natural reverse transcriptase stops (G79, G101, and G120). The baseline value above which glyoxalation is considered significant, 1806, is shown as a red line.

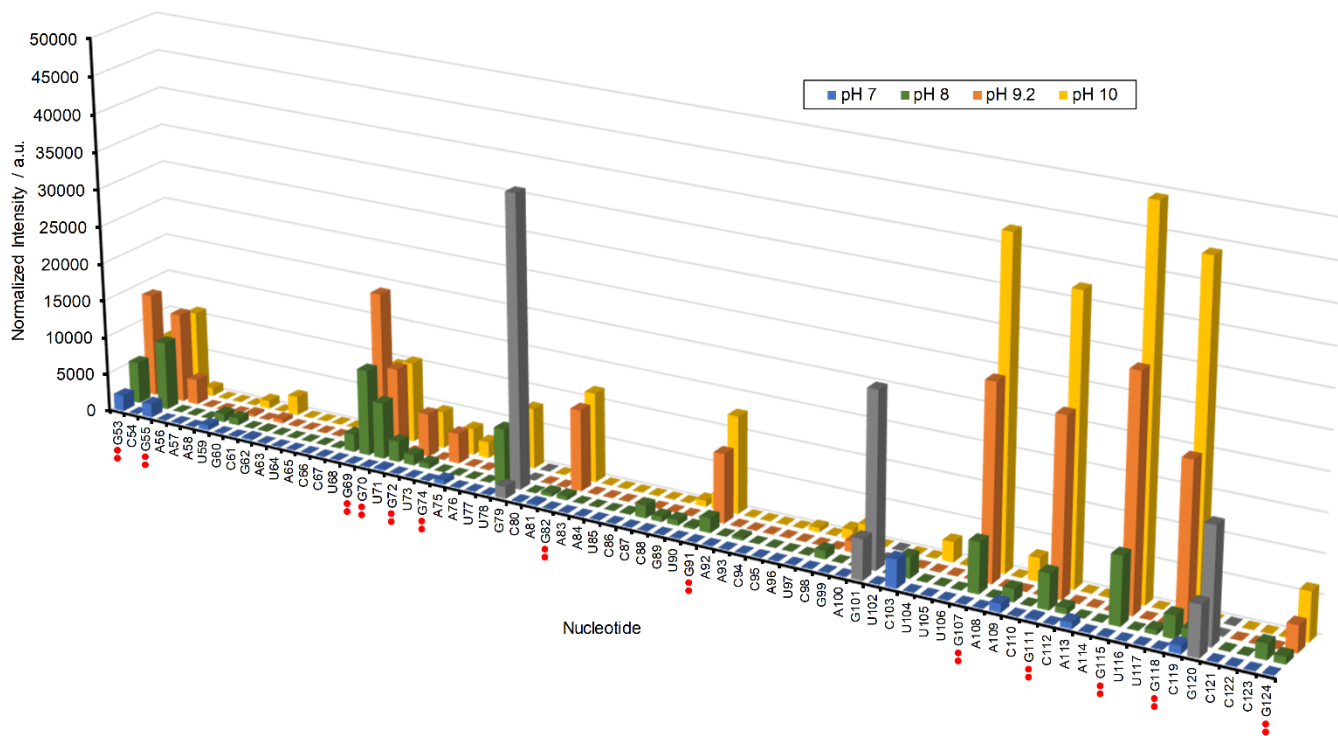

**Supplemental Figure S3.** Modification of rice 5.8S rRNA *in vitro* by methylglyoxal. All nucleotides within the examined range (G53-G124) are shown. Two red dots indicate significantly glyoxalated guanosines. Uridines, while shown, cannot be glyoxalated (see Fig. 2 in main text). G79, G101, and G120, which are the residues that give natural reverse transcriptase stops, are colored grey.

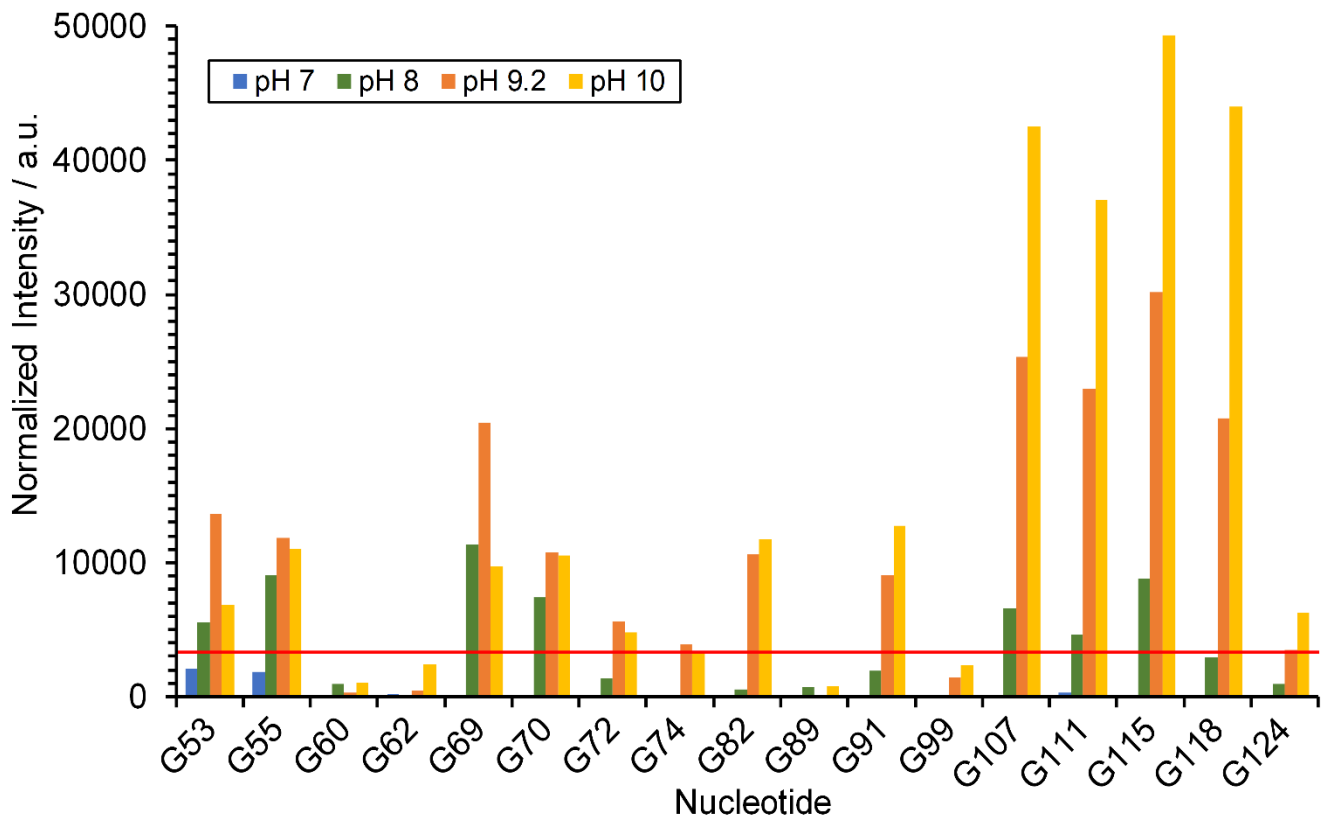

**Supplemental Figure S4.** Modification of guanosine residues with rice 5.8S rRNA *in vitro* by methylglyoxal. Normalized band intensities of all guanosine nucleotides within the examined range (G53-G124) are shown except for the three guanosines that give natural reverse transcriptase stops (G79, G101, and G120). The baseline value above which glyoxalation is considered significant, 3268, is shown as a red line.

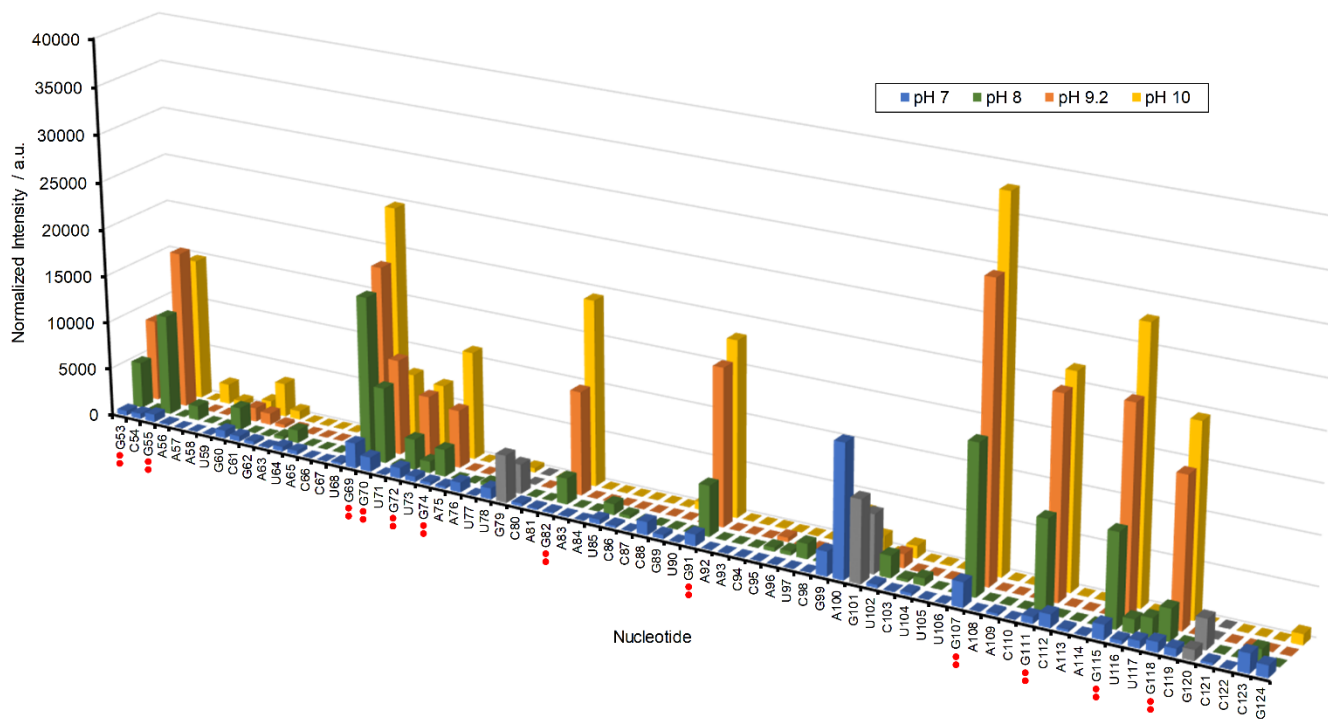

**Supplemental Figure S5.** Modification of rice 5.8S rRNA *in vitro* by phenylglyoxal. All nucleotides within the examined range (G53-G124) are shown. Two red dots indicate significantly glyoxalated guanosines. Uridines, while shown, cannot be glyoxalated (see Fig. 2 in main text). G79, G101, and G120, which are the residues that give natural reverse transcriptase stops, are colored grey.

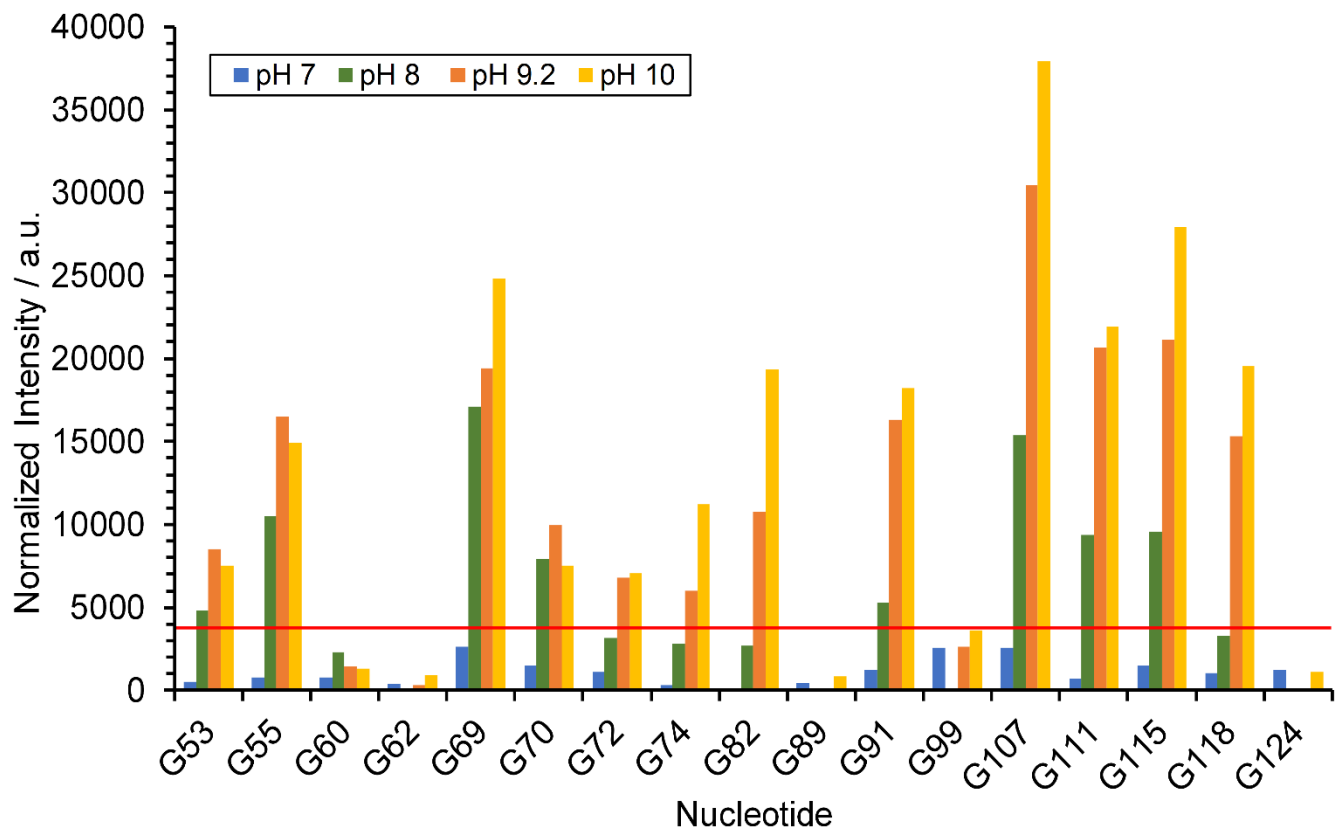

**Supplemental Figure S6.** Modification of guanosine residues with rice 5.8S rRNA *in vitro* by phenylglyoxal. Normalized band intensities of all guanosine nucleotides within the examined range (G53-G124) are shown except for the three guanosines that give natural reverse transcriptase stops (G79, G101, and G120). The baseline value above which glyoxalation is considered significant, 3910, is shown as a red line.

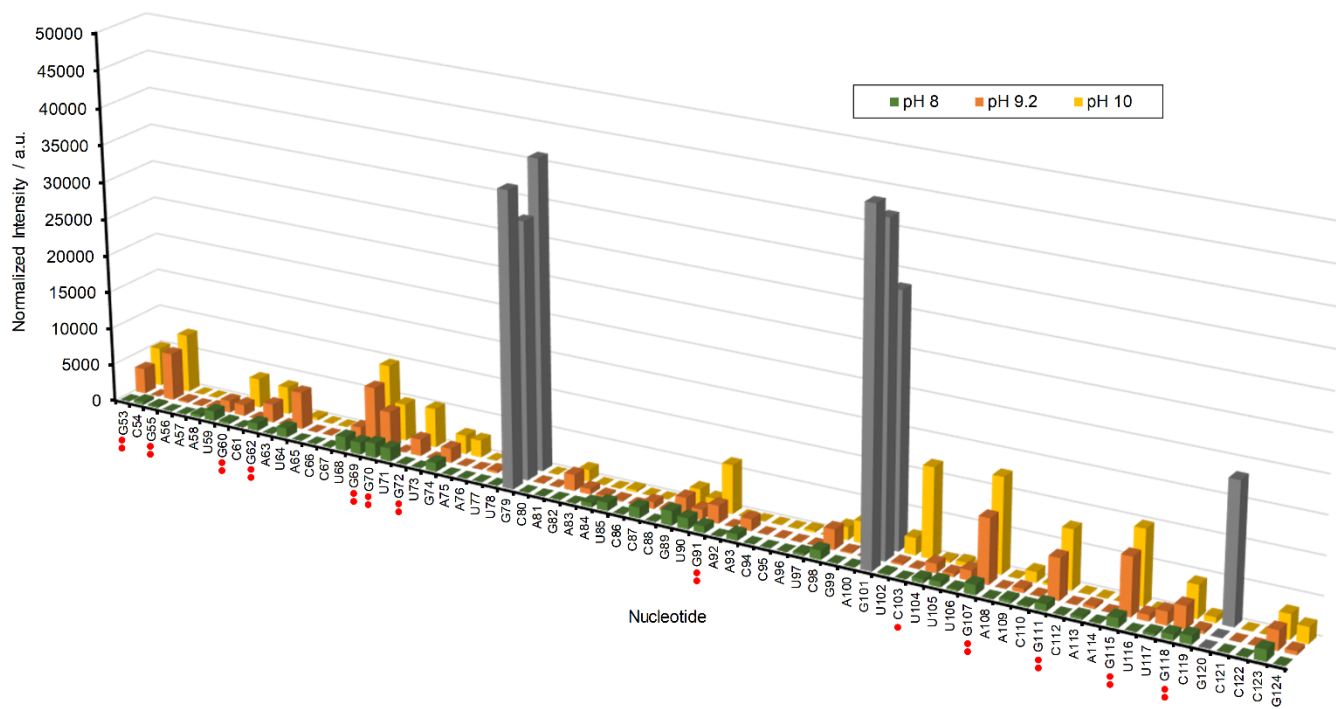

**Supplemental Figure S7.** Modification of rice 5.8S rRNA *in vitro* by dimethylglyoxal. All nucleotides within the examined range (G53-G124) are shown. Two red dots indicate significantly glyoxalated guanosines. Uridines, while shown, cannot be glyoxalated (see Fig. 2 in main text). G79, G101, and G120, which are the residues that give natural reverse transcriptase stops, are colored grey.



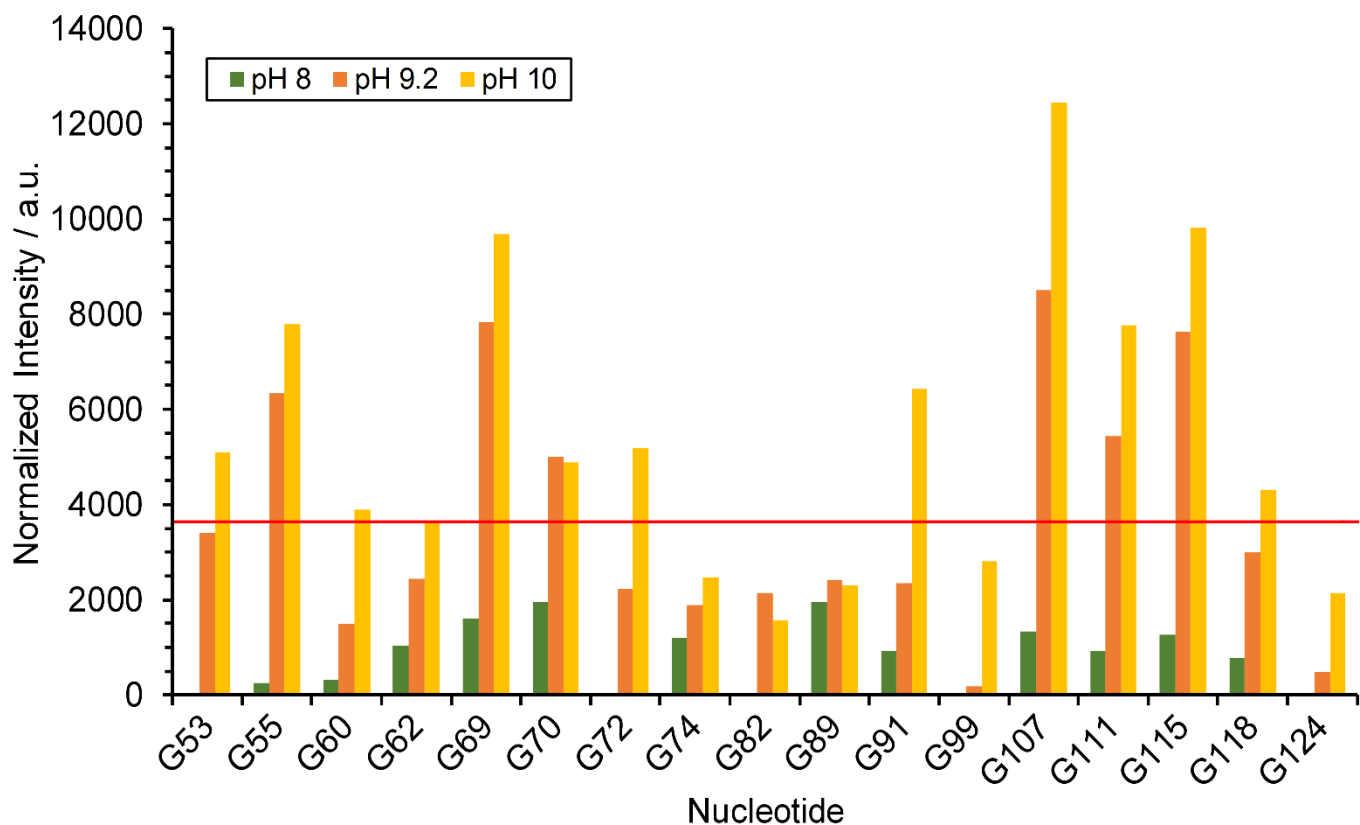

**Supplemental Figure S8.** Modification of guanosine residues with rice 5.8S rRNA *in vitro* by dimethylglyoxal. Normalized band intensities of all guanosine nucleotides within the examined range (G53-G124) are shown except for the three guanosines that give natural reverse transcriptase stops (G79, G101, and G120). The baseline value above which glyoxalation is considered significant, 3605, is shown as a red line.

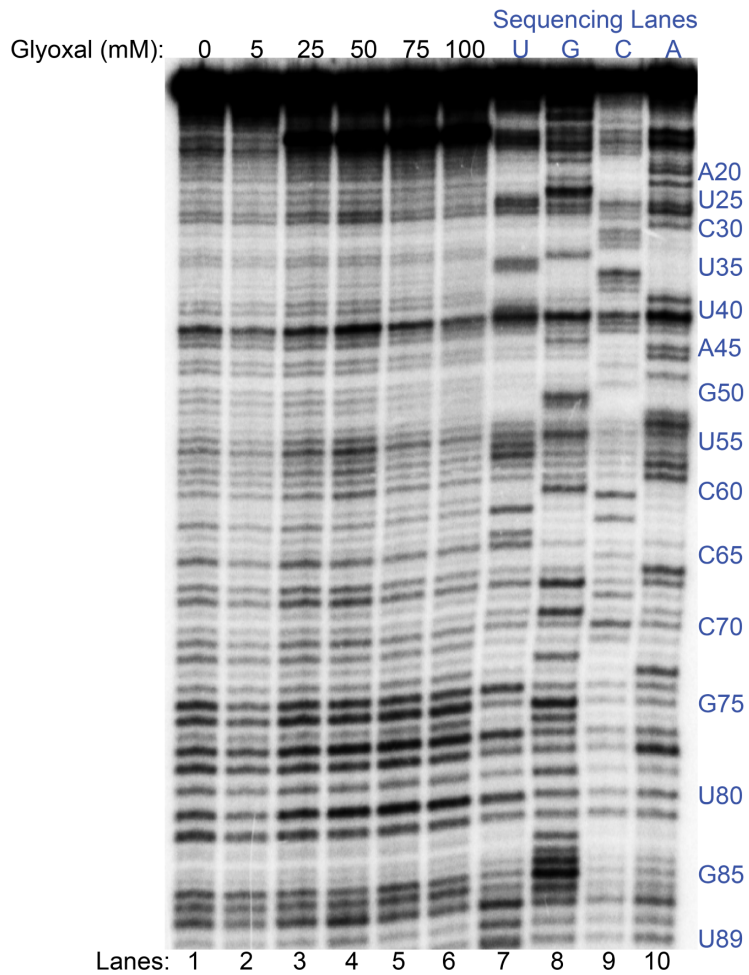

**Supplemental Figure S9.** Glyoxal modification of *B. subtilis* 5S *in vivo* analyzed by denaturing PAGE after reverse transcription to generate cDNAs. Lane 1 is the control (0 mM glyoxal) while lanes 2-6 show reactions from 5 mM to 100 mM glyoxal. Lanes 7-10 show dideoxy sequencing of U, G, C, and A.
